# 1 Predictors of breast cancer screening among women of 2 reproductive age in Tanzania: Evidence from DHS 2022

3 Jovin R. Tibenderana <sup>1\*</sup>

4 Sanun Ally Kessy <sup>1</sup>

5 Dosanto Felix Mlaponi <sup>1</sup>

6 Ndinagwe Lloyd Mwaitete <sup>2</sup>

7 John Elyas Mtenga <sup>2</sup>

8 <sup>1</sup> Department of Epidemiology and Biostatistics, Kilimanjaro Christian Medical University College, P. O. Box  
9 2240 Moshi, Tanzania

10 <sup>2</sup> Institute of Public Health, Kilimanjaro Christian Medical University College P. O. Box 2240 Moshi, Tanzania

11 Corresponding author: Jovin R. Tibenderana, E-mail: [jovintibe@gmail.com](mailto:jovintibe@gmail.com)

## 12 Abstract

### 13 Background

14 Breast cancer is a global concern, registering 2.3 million new cases and 685,000 deaths in 2020, with  
15 projections reaching 4.4 million cases by 2070. In Tanzania, it's the second leading cause of cancer-related  
16 deaths among women, often diagnosed at advanced stages, leading to poor outcomes. Only 5% of women  
17 in the country report undergoing breast cancer screening, the aim study is to determine factors associated  
18 with breast cancer screening in Tanzania.

### 19 Methods

20 A cross-sectional study among women of reproductive age in Tanzania, utilizing data from the  
21 Demographic and Health Surveys (DHS). We used available data on breast cancer screening the DHS.  
22 The outcome of the study was breast cancer screening. To find independent variables associated with  
23 breast cancer screening, logistic regression was used.

24 **Results**

25 After controlling for other factors, the following factors remained significantly associated with breast  
26 cancer screening among women of reproductive age; age(AOR=5.33, 95% CI 3.72, 7.63), being wealthy (  
27 AOR=2.34, 95% CI 1.61, 3.38), residing in rural(AOR= 0.59, 95% CI 0.46, 0.763), being educated(AOR=  
28 2.43, 95% CI 1.60, 3.68), being insured(AOR= 2.40, 95% CI 1.89, 3.06), healthcare facility visits in the past  
29 12 months(AOR=1.43, 95% CI 1.14, 1.78) and living in Northern zone( AOR= 2.43, 95% CI 1.42, 4.15)  
30 compared to western zone

31 **Conclusion**

32 Breast cancer screening is still under-utilized and have shown to be marginalized in women of reproductive  
33 age. Policies to address disparities, comprehensive health education and awareness campaigns are  
34 instrumental to increase utilization and reduction of burden of breast cancers in Tanzania

35

36 **Keywords:** Breast cancer, Breast cancer screening, Associated factors, Tanzania

## 38 Introduction

39 In the year 2020, there were around 2.3 million newly diagnosed cases of breast cancer and 685,000 deaths  
40 attributed to breast cancer globally(1,2) and cases are expected to rise up to 4.4 million in 2070 (3). In the  
41 women population, breast cancer comprised about 24.5% of total cancer cases and 15.5% of cancer-  
42 related deaths, securing the top position in terms of both incidence and mortality in the majority of countries  
43 worldwide in 2020(2).

44 Low- and middle-income countries (LMICs) and developing countries have seen a sharp increase in the  
45 incidence and mortality rates of breast cancer. These countries also have much lower 5-year survival rates  
46 for breast cancer, at around 53%.(2,4,5). In Africa the focus has mostly been in communicable diseases  
47 like Tuberculosis, leading to less engagement in NCDs e.g. Cancers and hence very low rate of breast  
48 cancer screening(5).

49 After cervical cancer, breast cancer stands as the second most prevalent cancer and the second leading  
50 cause of cancer-related deaths among women in Tanzania(6). Tanzanian women are expected to have a  
51 lifetime risk of 1 in 203 of acquiring breast cancer, and more than 50% of those who receive a diagnosis  
52 will pass away from the disease and related complications.(7). In Tanzania 80% of all women diagnosed  
53 with breast cancer are diagnosed late at stage III and IV where outcome is poor and treatment is not  
54 effective (6–8). Notably awareness seems to still be a problem, Morse and colleagues reported that 44%  
55 never heard of Self Breast exam 32% never heard of Clinical breast examination(9).

56 In Tanzania, 14.4% of newly diagnosed malignancies in women are breast cancers. The number of newly  
57 diagnosed cases of breast cancer in Tanzania is expected to rise by 82% by 2030(6). Tanzania has an  
58 age-standardized incidence of 19.4/100,000 women with breast cancer and an age-standardized death rate  
59 of 9.7/100,000. This translates to a mortality-to-incidence ratio (MIR) of 0.5 (6,10,11). Among females  
60 15.9% of all new diagnosed cancers in 2022 were breast cancer in Tanzania and ranked second for both  
61 males and females for the newly diagnosed cancers.(10).

62 Tanzania Demographic health survey 2022 has reported that, only 5% of women age 15–49 reported that  
63 they had been screened for breast cancer in Tanzania(12). Most of the studies in Tanzania have studied  
64 factors associated with awareness of breast cancer screening(6,9,13,14)

65 Screening can effectively reduce mortality, morbidity as well as poor quality of life from breast  
66 cancer(15,16). For early detection of breast cancer employment of methods like self-breast examination,  
67 clinical-breast examination and mammography must be employed. these methods are said to reduce the  
68 rate of mortality from breast cancer by 25-30%(17).

69 A multi-country study has revealed significant associations between breast cancer screening and various  
70 factors. These factors encompass higher educational attainment, advanced age, possession of health  
71 insurance, elevated socio-economic status, and ownership of a television(5). The true extent of breast  
72 cancer prevalence is not accurately represented in many Sub-Saharan African (SSA) countries, leading to  
73 underreporting and a lack of a genuine reflection of the disease burden(18,19).

74 Research on breast cancer screening in Tanzania are limited, little is known about factors associated with  
75 breast cancer screening in Tanzania(20). This baseline knowledge is essential in influencing educational  
76 programs that enhance comprehension and focus on evidence-based, lifestyle-oriented interventions for  
77 breast cancer screening and promoting early detection and treatment. It's crucial therefore to identify factors  
78 affecting breast cancer screening, hence this study purpose is to determine factors associated with breast  
79 cancer screening in Tanzania.

80

81

82

## 83 **Material and Methods**

84 **Study setting and period.**

85 The study utilized the Tanzania Demographic and Health Survey (TDHS) data, a nationwide cross-sectional  
86 survey conducted every 5 years (21). TDHS 2022 is the most recent data which collected data on breast  
87 cancer screening among women of reproductive age. Tanzania is the largest country in East Africa,  
88 covering 940,000 square kilometers, 60,000 of which are inland water. The population of Tanzania as of  
89 2022 was estimated to be 61,741,120 with an annual population growth rate of 3.2% (21,22).

90

## 91 Study design and data source

92 This was an analytical cross-sectional study conducted using nationally representative secondary data  
93 from the Tanzania demographic and health surveys (TDHS) of 2022. We explored women's data. DHS is  
94 national representative data which is funded by the U.S Agency for International Development and  
95 implemented by the Ministry of Health (MoH) (Tanzania Mainland), Ministry of Health (MoH) (Zanzibar),  
96 National Bureau of Statistics (NBS), Office of the Chief Government Statistician (OCGS) and technical  
97 support from ICF international(21–24).

98

## 99 Sampling technique

100 The survey was conducted using face-to-face questionnaire interviews and used stratified design,  
101 multistage cluster sampling to collect information about population health status, neonatal mortality, health  
102 behaviors, nutritional status family planning and demographics.

103 First, clusters (629) were identified and households were then selected. Among these, 26 households were  
104 systematically chosen as representative from each cluster comprising a total of 16,354 households.  
105 Eligibility for inclusion was based on all women 15-49 years old present in the sampled household the night  
106 before the interview. Detailed information on sampling procedure and design has been previously  
107 reported(12).

108

## 109 Variables

110 The dependent variable for this study was breast cancer screening, which was measured by a question  
111 'Has a doctor or other healthcare provider examined your breasts to check for breast cancer?' and the  
112 detailed information on the breast cancer screening has been published elsewhere(20). The binary  
113 response was Yes/No, following the approach employed by other researches who utilized DHS  
114 data(5,27,28). Women who were unaware of their screening status were not included in this study.

115 The independent variables were social-demographic and socio economic factors, furthermore we  
116 investigated the association between breast cancer screening and various factors including age, wealth  
117 index, residence, number of living children, marital status, education, health insurance, employment,  
118 pregnancy status, house hold ownership of radio or television, healthcare facility visits in the past 12  
119 months, breast feeding status and geographical zones as reported by other researchers (5,24,27,28). We  
120 recategorized wealth index from five to three categories combining poorest and poorer as 'poor' middle  
121 wealth as 'middle' and richer and richest as 'rich' aligning with previous research practices(5,29–33).

122 Additionally, the age of survey respondents was recorded as continuous variable, was grouped into three  
123 categories 15-24, 25-34 and 35-49 years old as others researchers (5,31). Furthermore, mothers  
124 employment status was recategorized into two categories 'working' and 'not working' as previously  
125 categorized (34).

## 126 Data management and analysis

127 Data cleaning and analysis were conducted using Stata 18. Categorical variables were summarized using  
128 frequencies and percentages. The Pearson Chi-squared test investigated the association between breast  
129 cancer screening and participants characteristics. Logistic regression was employed was carried out to  
130 assess associations between dependent and independent variables with 95% confidence intervals (CI).  
131 The variables associated at binary logistic regression with a significance level ( $p = 0.20$ ) were entered into  
132 multiple logistic regression to identify key determinants while controlling for potential confounding effects.  
133 Statistical significance was indicated at a p-value of 0.05, and predictors of the outcome variable were

134 identified accordingly. The variables reported were those found to be significantly associated based on  
135 adjusted odds ratios.

## 136 Ethical consideration

137 The formal written request was submitted to the DHS program and approval was given to access and utilize  
138 data from <http://www.dhsprogram.com>. The questionnaire for standard DHS was reviewed and approved  
139 Medical Research Council of Tanzania and the Zanzibar Health Research Institute and ICF's Internal  
140 Review Board (IRB). Participants provided either written or verbal informed consent before participating in  
141 the survey. Respondents were not subjected to any form of coercion and all data are protected ensuring  
142 no any personally identifiable information (5,25).Further details on ethical consideration are available  
143 elsewhere (26).

144

145

## 146 Results

### 147 Participant characteristics.

148 Among 15,188 participants of this study, the mean (SD) age was 29.3(9.8). Almost all (94.3%) of the study  
149 participants were uninsured. Slightly less than half of the study participants were from rich households  
150 (48.7%) and the majority (64.3%) of women were from rural. Few (29.8%) of the respondents were aged  
151 between 25-34, where nearly half (48.6%) had primary education. Of all participants 92.4% were not  
152 pregnant nor did they know their pregnancy status (Table1).

153 The majority of women (60.1%) were either married or living with a partner. Some women in this study were  
154 not working (36.9%). Around half (52.4%) of women did not have radios in their households while some  
155 (34.2%) have television. More than half (53.8%) of the participants had history of visiting healthcare facility  
156 for the past 12 months prior the survey. Few of the study participants were breastfeeding during the survey

157 (22.7%). Very few (5.2%) of respondents were from Southern zone and around half (53.2%) had 1-4 living  
 158 children (Table1).

159

160 **Table 1:** Weighted: Self-reported breast cancer screening by participant characteristics (N=15,188)

| Variable                   | Total (%)      | Ever screened for breast cancer |             | P-value |
|----------------------------|----------------|---------------------------------|-------------|---------|
|                            |                | No (%)                          | Yes (%)     |         |
| <b>Health insurance</b>    |                |                                 |             | <0.001  |
| No                         | 14,302 (94.2%) | 13,664 (94.9%)                  | 638 (80.9%) |         |
| Yes                        | 887 (5.8%)     | 736 (5.1%)                      | 151 (19.1%) |         |
| <b>Wealth Index status</b> |                |                                 |             | <0.001  |
| Poor                       | 5,015 (33.0%)  | 4,929 (34.2%)                   | 87 (11.0%)  |         |
| Middle                     | 2,870 (18.9%)  | 2,756 (19.1%)                   | 114 (14.5%) |         |
| Rich                       | 7,304 (48.1%)  | 6,716 (46.6%)                   | 588 (74.5%) |         |
| <b>Residence</b>           |                |                                 |             | <0.001  |
| Urban                      | 5,428 (35.7%)  | 4,953 (34.4%)                   | 475 (60.2%) |         |
| Rural                      | 9,761 (64.3%)  | 9,447 (65.6%)                   | 314 (39.8%) |         |
| <b>Age group(years)</b>    |                |                                 |             | <0.001  |
| 15-24                      | 5,778 (38.0%)  | 5,674 (39.4%)                   | 103 (13.1%) |         |
| 25-34                      | 4,591 (30.2%)  | 4,350 (30.2%)                   | 241 (30.5%) |         |
| 35-49                      | 4,821 (31.7%)  | 4,376 (30.4%)                   | 445 (56.4%) |         |
| <b>Education</b>           |                |                                 |             | <0.001  |
| No education               | 2,430 (16.0%)  | 2,380 (16.5%)                   | 49 (6.2%)   |         |
| Primary                    | 8,087 (53.2%)  | 7,669 (53.3%)                   | 417 (52.9%) |         |
| Secondary/higher           | 4,673 (30.8%)  | 4,351 (30.2%)                   | 322 (40.9%) |         |
| <b>Pregnancy status</b>    |                |                                 |             | 0.272   |
| No or unsure               | 14,013 (92.3%) | 13,275 (92.2%)                  | 738 (93.5%) |         |



|                                         |                |                |             |        |
|-----------------------------------------|----------------|----------------|-------------|--------|
| Yes                                     | 1,177 (7.7%)   | 1,126 (7.8%)   | 51 (6.5%)   |        |
| <b>Marital status</b>                   |                |                |             | <0.001 |
| Never married                           | 4,022 (26.5%)  | 3,910 (27.2%)  | 112 (14.2%) |        |
| Married/living with partner             | 9,220 (60.7%)  | 8,692 (60.4%)  | 528 (66.9%) |        |
| Widowed/divorced/separated              | 1,948 (12.8%)  | 1,799 (12.5%)  | 149 (18.9%) |        |
| <b>Employment status</b>                |                |                |             | <0.001 |
| Not working                             | 5,424 (35.7%)  | 5,248 (36.4%)  | 176 (22.4%) |        |
| Working                                 | 9,765 (64.3%)  | 9,153 (63.6%)  | 612 (77.6%) |        |
| <b>Household has radio</b>              |                |                |             | <0.001 |
| No                                      | 7,735 (52.5%)  | 7,431 (53.2%)  | 303 (39.5%) |        |
| Yes                                     | 6,998 (47.5%)  | 6,533 (46.8%)  | 465 (60.5%) |        |
| <b>Household has television</b>         |                |                |             | <0.001 |
| No                                      | 9,783 (66.4%)  | 9,429 (67.5%)  | 354 (46.0%) |        |
| Yes                                     | 4,950 (33.6%)  | 4,535 (32.5%)  | 415 (54.0%) |        |
| <b>Visited healthcare facility last</b> |                |                |             |        |
| <b>12 months</b>                        |                |                |             | <0.001 |
| No                                      | 7,134 (47.0%)  | 6,875 (47.7%)  | 260 (32.9%) |        |
| Yes                                     | 8,055 (53.0%)  | 7,526 (52.3%)  | 529 (67.1%) |        |
| <b>Breastfeeding status</b>             |                |                |             | 0.115  |
| No                                      | 11,713 (77.1%) | 11,078 (76.9%) | 635 (80.5%) |        |
| Yes                                     | 3,476 (22.9%)  | 3,323 (23.1%)  | 154 (19.5%) |        |
| <b>Zones</b>                            |                |                |             | <0.001 |
| Western zone                            | 1,266 (8.3%)   | 1,246 (8.7%)   | 21 (2.6%)   |        |
| Northern zone                           | 1,731 (11.4%)  | 1,616 (11.2%)  | 115 (14.6%) |        |
| Central zone                            | 1,569 (10.3%)  | 1,503 (10.4%)  | 65 (8.3%)   |        |
| Southern highlands                      | 924 (6.1%)     | 863 (6.0%)     | 61 (7.7%)   |        |
| Southern zone                           | 803 (5.3%)     | 773 (5.4%)     | 30 (3.8%)   |        |
| south west highlands                    | 1,322 (8.7%)   | 1,253 (8.7%)   | 69 (8.7%)   |        |

|                                  |               |               |             |                  |
|----------------------------------|---------------|---------------|-------------|------------------|
| Lake zone                        | 4,406 (29.0%) | 4,197 (29.1%) | 209 (26.6%) |                  |
| Eastern zone                     | 2,651 (17.5%) | 2,458 (17.1%) | 193 (24.4%) |                  |
| Zanzibar                         | 516 (3.4%)    | 490 (3.4%)    | 26 (3.3%)   |                  |
| <b>Number of living children</b> |               |               |             | <b>&lt;0.001</b> |
| None                             | 3,950 (26.0%) | 3,855 (26.8%) | 95 (12.0%)  |                  |
| 1-4                              | 8,457 (55.7%) | 7,900 (54.9%) | 557 (70.6%) |                  |
| >4                               | 2,783 (18.3%) | 2,646 (18.4%) | 137 (17.4%) | <b>&lt;0.001</b> |

161

162

## 163 Factors associated with breast cancer screening

164 Logistic regression analysis was carried out to determine the association between independent variables  
 165 and breast cancer screening among the study participants. Health insurance, wealth index status,  
 166 residence, age group(years), education, pregnancy status, marital status, employment status, household  
 167 has radio, household has television, visited healthcare facility last 12 months, breastfeeding status, zones,  
 168 number of living children were found to be significantly associated with the breast cancer screening on  
 169 binary logistic regression while age, wealth index, residence, education, health insurance, healthcare facility  
 170 visits in the past 12 months and some of geographical zones such as northern zone, southern highlands,  
 171 southwest highlands, lake zone and eastern zone on multivariate logistic regression.

172 Table 2 highlights the factors associated with breast cancer screening among women of reproductive age.  
 173 In a multivariate logistic regression, older women aged 35 years and above were 5 times more likely to be  
 174 screened for breast cancer (AOR= 5.33 95% CI 3.72, 7.63) compared to the younger participants aged 15-  
 175 24. Participants with health insurance had 2 times higher odds of being screened for breast cancer  
 176 compared to those without (AOR= 2.40, 95% CI 1.89, 3.06). Women from rich households had 2 times  
 177 higher odds of breast cancer screening compared to those from poor (AOR= 2.34, 95% CI 1.61, 3.38).  
 178 Women residing in rural areas were 41% less likely to be screened for breast cancer compared to those in  
 179 urban areas (AOR= 0.59, 95% CI 0.46, 0.763).

180

181 **Table 2:** Factors associated with breast cancer screening among women of reproductive age in Tanzania

| <b>Variable</b>             | <b>Crude OR (95% CI)</b> | <b>Adjusted OR (95% CI)</b> |
|-----------------------------|--------------------------|-----------------------------|
| <b>Health insurance</b>     |                          |                             |
| No                          | ref                      |                             |
| Yes                         | 4.39 (3.46,5.57)         | 2.40(1.89, 3.06)            |
| <b>Wealth Index status</b>  |                          |                             |
| Poor                        | ref                      |                             |
| Middle                      | 2.36 (1.70, 3.29)        | 1.81(1.29, 2.56)            |
| Rich                        | 4.98(3.80, 6.53)         | 2.34(1.61, 3.38)            |
| <b>Residence</b>            |                          |                             |
| Urban                       | ref                      |                             |
| Rural                       | 0.35(0.28,0.42)          | 0.59(0.46, 0.763)           |
| <b>Age group(years)</b>     |                          |                             |
| 15-24                       | ref                      |                             |
| 25-34                       | 3.04 (2.23, 4.14)        | 2.34(1.62, 3.38)            |
| 35-49                       | 5.59(4.31, 7.25)         | 5.33(3.72, 7.63)            |
| <b>Education</b>            |                          |                             |
| No education                | ref                      |                             |
| Primary                     | 2.63(1.85,3.74)          | 1.74(1.19, 2.54)            |
| Secondary/higher            | 3.58(2.48, 5.18)         | 2.43(1.60, 3.68)            |
| <b>Pregnancy status</b>     |                          |                             |
| No or unsure                | ref                      |                             |
| Yes                         | 0.82(0.56, 1.18)         | 1.11(0.75, 1.64)            |
| <b>Marital status</b>       |                          |                             |
| Never married               | ref                      |                             |
| Married/living with partner | 2.12(1.66, 2.72)         | 1.18 (0.82, 1.70)           |

|                            |                  |                  |
|----------------------------|------------------|------------------|
| Widowed/divorced/separated | 2.91(2.08, 4.06) | 1.39(0.88, 2.19) |
|----------------------------|------------------|------------------|

**Employment status**

|             |                  |                  |
|-------------|------------------|------------------|
| Not working | ref              |                  |
| Working     | 1.99(1.55, 2.56) | 1.18(0.92, 1.53) |

**Household has radio**

|     |                  |                  |
|-----|------------------|------------------|
| No  | ref              |                  |
| Yes | 1.74(1.45, 2.09) | 1.02(0.83, 1.26) |

**Household has television**

|     |                  |                  |
|-----|------------------|------------------|
| No  | ref              |                  |
| Yes | 2.44(1.99, 2.98) | 1.01(0.78, 1.32) |

**Visited healthcare facility last**

**12 months**

|     |                  |                  |
|-----|------------------|------------------|
| No  | ref              |                  |
| Yes | 1.86(1.53, 2.26) | 1.43(1.14, 1.78) |

**Breastfeeding status**

|     |                  |                  |
|-----|------------------|------------------|
| No  | ref              |                  |
| Yes | 0.81(0.61, 1.06) | 1.09(0.79, 1.48) |

**Zones**

|                     |                  |                  |
|---------------------|------------------|------------------|
| Western zone        | ref              |                  |
| Northern zone       | 4.28(2.37, 7.74) | 2.43(1.42, 4.15) |
| Central zone        | 2.60(1.28, 5.29) | 1.77(0.98, 3.17) |
| Southern highlands  | 4.23(2.32, 7.69) | 2.22(1.26, 3.9)  |
| Southern zone       | 2.31(1.15, 4.65) | 1.70(0.89, 3.23) |
| Southwest highlands | 3.29(1.79, 6.06) | 2.18(1.27, 3.74) |
| Lake zone           | 2.99(1.68, 5.32) | 2.09(1.23, 3.54) |
| Eastern zone        | 4.70(2.64, 8.37) | 1.88(1.10, 3.22) |
| Zanzibar            | 3.14(1.76, 5.62) | 1.57(0.91, 2.73) |

**Number of living children**

|      |                  |                   |
|------|------------------|-------------------|
| None | ref              |                   |
| 1-4  | 2.87(2.20, 3.74) | 1.15(0.80, 1.64)  |
| >4   | 2.11(1.54, 2.89) | 0.91(0.591, 1.40) |

---

182

183

184

185

186

## 187 Discussion

188 This cross-sectional study assessed factors associated with breast cancer screening among women of  
189 reproductive age in Tanzania, A sizable sample of women participated in this survey, which helped us  
190 identify screening drivers and offers insights into their background characteristics, after controlling for other  
191 determinants the following factors remained significant predictors for breast cancer screening; age, wealth  
192 index, residence, education, health insurance, healthcare facility visits in the past 12 months and some of  
193 geographical zones such as northern zone, southern highlands, southwest highlands, lake zone and  
194 eastern zone.

195 The occurrence and fatality rates of breast cancer have experienced a rapid rise in developing nations like  
196 Tanzania and a decline in developed countries(2).Radiologist, Oncologist, breast surgeons and  
197 pathologists who play a crucial role in early detection and planning of the treatment are still scarce in  
198 Tanzania(6).

199 Age emerged as a very influential predictor, this could be explained by older women are vulnerable and  
200 are more knowledgeable about breast cancer screening(9,13,14).This findings are consistent with previous  
201 studies which also found older women were more likely to screen for breast cancer than younger  
202 women(5,27). Most of the health care facilities recommend women aged 40 years and above to undergo

203 breast cancer screening to prevent them from breast cancer(35). On the other hand, most SSA countries  
204 do not have national screening programs as well as enough funds to screen all eligible women(35).

205 In Tanzania particularly, there is unclear and unstandardized protocol for early breast cancer screening on  
206 top of that inefficient referral system adds cost and delay most of the clients with breast lesions(11). Due to  
207 poor financial and human resources in SSA, yearly clinical breast examination to women under 40 years  
208 may be useful way to find early signs of breast cancer (36–39). Previous researches have shown that 20%  
209 of breast cancer occur among women aged 30-40 years (37)(40,41). Moreover, a study indicated that in  
210 SSA only 2.2% of women aged 40-69 years screened for breast cancer in the past 5 years (42).  
211 Furthermore, a study done in Sudan depicted that engaging local community volunteers for clinical breast  
212 examination might potentially enhance the early diagnosis of breast cancer in women who do not exhibit  
213 any clinical symptom(43).

214 As one might anticipate, and in line with previous studies(5,27,28), there was a positive association between  
215 health insurance coverage and breast cancer screening. This may be the case due to the fact that having  
216 health insurance gives women the chance to receive preventative treatment at no additional expense. We  
217 found that wealth was positively associated with breast cancer screening, wealthy women are better able  
218 to afford health insurance which result in receiving preventive care services with no or minimum cost, on  
219 the other hand poor women are less likely to prioritize preventive care services over their daily needs (5,42).

220 The negative association between breast cancer screening and living in the rural was not unexpected and  
221 can be explained by uneven access to healthcare services and insufficiency of health care facilities that  
222 can offer breast cancer screening compared to urban(5,28,44).

223 Educational attainment demonstrated a positive association with screening, educated women may know  
224 the harmful effect of breast cancer and early detection measures (45,46) and this showcase the role of  
225 education in promoting health-seeking behaviors, our study is in accordance with earlier studies which  
226 found that educated women were more likely to be screened for breast cancer than those with no  
227 education(27,28).

228 Notably, healthcare facility visits in the past year was positively associated with breast cancer screening,  
229 this emphasizes the impact of regular health check-ups and it aligns with the findings from previous study  
230 which found that women who visited healthcare facility in the past 12 months were more likely to screen  
231 for breast cancer compared to those who didn't (5).

232 Unlike other studies(5,27), our study found that mass media exposure(having television or radio in the  
233 household) was not associated with breast cancer screening after controlling for other factors this can be  
234 explained by lack of political will on promoting breast cancer screening as well as logistical challenges in  
235 accessing screening services, cultural considerations and socioeconomic disparities among Tanzania  
236 women of reproductive age.

237

## 238 Strength and limitation

239 This is population- based cross- sectional study of more than 15, 000 women of reproductive age in  
240 Tanzania, the findings may contribute to improving breast cancer screening uptake among women of  
241 reproductive age. The limitation of this study include, the study was limited to only women of reproductive  
242 age 15-49 and evidence suggest that median age of breast cancer diagnosis is 62 (47).Also, the study is  
243 prone to recall bias because the response was self-reported, additionally DHS does not capture timing of  
244 the breast cancer screening which is essential for early diagnosis and treatment. Lastly, the study is a  
245 cross sectional nature of the survey which does not allow for the determination of temporal relationships

246

247

## 248 Conclusion and recommendation

249 Very few women of reproductive age in Tanzania get screened for breast cancer, it is crucial to address  
250 this escalating burden of breast cancer through heightened health awareness, effective prevention  
251 strategies, and enhanced access to medical treatment. Older age, being wealthy, residing in rural areas,

252 being educated, having health insurance, healthcare facility visits in the past 12 months and some of  
253 geographical zones such as northern zone, southern highlands, south west highlands, lake zone and  
254 eastern zone were independently associated with breast cancer screening. These findings suggest that  
255 focused interventions are needed to lower the disease's incidence and increase survivor rates. Women of  
256 reproductive age should be made aware of the advantages of breast cancer screening through extensive  
257 health education and awareness programs. Making breast cancer screening easier to afford and reach,  
258 especially in rural regions, is vital. Emphasizing and executing Universal Health Insurance (UHI) could help  
259 more financially constrained women access breast cancer screenings. Future studies should make use of  
260 qualitative and longitudinal approaches so as to explore deeply as per why women of reproductive age  
261 don't screen for breast cancer. Data regarding the time of breast cancer screenings should be gathered for  
262 future surveys conducted in Tanzania. The survey should be improved in order to precisely record the  
263 particular kind of screening that was carried out, such as mammography or clinical breast examination  
264 (CBE).

265

266

267

268

## 269 **Funding**

270 This research did not receive any specific grant from funding agencies in the public, commercial, or not-for-  
271 profit sectors.

272

273

## 274 **Authorship contributions**



275 **Jovin R Tibenderana:** Conceptualization, Data curation, Formal analysis, Investigation, Methodology,  
276 Project administration, Supervision, Validation, Visualization, Writing – original draft, Writing – review &  
277 editing. **Sanun Ally Kessy:** Investigation, Data curation, Writing – review & editing, Visualization. **Dosanto**  
278 **Felix Mlaponi:** Investigation, Data curation, Writing – review & editing, Visualization. **Ndinagwe Lloyd**  
279 **Mwaitete:** Investigation, Data curation, Writing – review & editing, Visualization. **John Elyas Mtenga:**  
280 Investigation, Data curation, Writing – review & editing, Visualization, Supervision, Validation.

281

282

## 283 **Disclosure**

284 The authors report no conflicts of interest in this work.

## 285 **Abbreviations**

286 AOR, Adjusted odds ratio;

287 CI, Confidence Interval;

288 COR, Crude odds ratio;

289 DHS, Demographic Health Survey;

290

291

292

293

294

295

## 296 Reference

- 297 1. Lei S, Zheng R, Zhang S, Wang S, Chen R, Sun K, et al. Global patterns of breast cancer  
298 incidence and mortality: A population-based cancer registry data analysis from 2000 to 2020.  
299 Cancer Commun. 2021;41(11):1183–94.
- 300 2. Sung H, Ferlay J, Siegel RL, Laversanne M, Soerjomataram I, Jemal A, et al. Global Cancer  
301 Statistics 2020 : GLOBOCAN Estimates of Incidence and Mortality Worldwide for 36 Cancers in  
302 185 Countries. 2021;71(3):209–49.
- 303 3. Soerjomataram I, Bray F. Planning for tomorrow: global cancer incidence and the role of  
304 prevention 2020–2070. Nat Rev Clin Oncol [Internet]. 2020; Available from:  
305 <http://dx.doi.org/10.1038/s41571-021-00514-z>
- 306 4. Ginsburg O, Rositch AF, Conteh L, Mutebi M, Paskett ED, Subramanian S. Breast Cancer  
307 Disparities Among Women in Low- and Middle-Income Countries. 2020;
- 308 5. Ba DM, Ssentongo P, Agbese E, Yang Y, Cisse R, Diakite B, et al. Prevalence and determinants  
309 of breast Saharan cancer screening in four sub- - African countries : a population- - based study.  
310 2020;1–8.
- 311 6. Breast Cancer Initiative. Tanzania Breast Health Care Assessment 2017: An assessment of breast  
312 cancer early detection, diagnosis and treatment in Tanzania. Available  
313 <https://ww5.komen.org/breastcancertanzania> [Internet]. 2017;1–62. Available from:  
314 [https://ww5.komen.org/uploadedFiles/\\_Komen/Content/Grants\\_Central/International\\_Grants/Grant](https://ww5.komen.org/uploadedFiles/_Komen/Content/Grants_Central/International_Grants/Grant)  
315 [ee\\_Resources/Full\\_Tanzania\\_Assessment\\_report.pdf](https://ww5.komen.org/uploadedFiles/_Komen/Content/Grants_Central/International_Grants/Grant)
- 316 7. Mbonde MP, Amir H, Mbembati NA, Holland R, Schwartz-Albiez R, Kitinya JN. Characterisation of  
317 benign lesions and carcinomas of the female breast in a sub-Saharan African population. Pathol  
318 Res Pract. 1998;194(9):623–9.
- 319 8. Mwakigonja AR, Rabiél H, Mbembati NA, Lema LEK. The pattern of prognostic and risk indicators  
320 among women with breast cancer undergoing modified radical mastectomy in Dar es Salaam,

- 321 Tanzania. *Infect Agent Cancer* [Internet]. 2016;11(1):1–10. Available from:  
322 <http://dx.doi.org/10.1186/s13027-016-0075-8>
- 323 9. Morse EP, Maegga B, Joseph G, Miesfeldt S. *Breast Cancer : Basic and Clinical Research*.  
324 2014;73–9.
- 325 10. International Council for Building. Tanzania, United Republic of (TZA). *Int Dir Build Res Inf Dev*  
326 *Organ*. 2020;220–220.
- 327 11. Torre LA, Bray F, Siegel RL, Ferlay J, Lortet-Tieulent J, Jemal A. *Global cancer statistics, 2012*.  
328 *CA Cancer J Clin*. 2015;65(2):87–108.
- 329 12. *Demographic and Health Surveys*. *Demographic and Health Survey and Malaria Indicator Survey*  
330 *(TDHS-MIS)*. 2022.
- 331 13. Chao CA, Huang L, Visvanathan K, Mwakatobe K, Masalu N, Rositch AF. Understanding women’s  
332 perspectives on breast cancer is essential for cancer control: Knowledge, risk awareness, and  
333 care-seeking in Mwanza, Tanzania. *BMC Public Health*. 2020;20(1):1–11.
- 334 14. Burson AM, Soliman AS, Ngoma TA, Mwaiselage J, Ogweyo P, Eissa MS, et al. Clinical and  
335 epidemiologic profile of breast cancer in Tanzania. *Breast Dis*. 2010;31(1):33–41.
- 336 15. Cumber SN, Nchanji KN, Tsoka-Gwegweni JM. Breast cancer among women in sub-Saharan  
337 Africa: prevalence and a situational analysis. *South African J Gynaecol Oncol* [Internet].  
338 2017;9(2):35–7. Available from: <http://doi.org/10.1080/20742835.2017.1391467>
- 339 16. Black E, Richmond R. Improving early detection of breast cancer in sub-Saharan Africa: Why  
340 mammography may not be the way forward. *Global Health*. 2019;15(1):1–11.
- 341 17. Abeje S, Seme A, Tibelt A. Factors associated with breast cancer screening awareness and  
342 practices of women in Addis Ababa, Ethiopia. *BMC Womens Health*. 2019;19(1):1–8.
- 343 18. Mutebi M, Chb MB, Surg M, Edge J, Surg M, Town C, et al. Stigma , survivorship and solutions :  
344 Addressing the challenges of living with breast cancer in low-resource areas. 2014;104(5):1–3.

- 345 19. Ilo CI, Nnenna L, Nwimo IO, Onwunaka C. Breast Cancer Knowledge among Women in Ebonyi  
346 State , Nigeria : Implication for Women Breast Cancer Education Health Education Research &  
347 Development. 2020;3(2):1–7.
- 348 20. Laura Viens, Doug Perin, Virginia Senkomago, Antonio Neri and MS. Questions About Cervical  
349 and Breast Cancer Screening Knowledge, Practice, and Outcomes: A Review of Demographic  
350 and Health Surveys. 2018;26(5):403–12.
- 351 21. Ministry of Health. Tanzania Ministry of Health [Internet]. 2023 [cited 2023 Dec 16]. Available from:  
352 <https://www.moh.go.tz/>
- 353 22. NBS Tanzania. National Bureau of Statistics [Internet]. Manufacturing Index. 2023 [cited 2023 Dec  
354 16]. p. 4–7. Available from:  
355 <https://www.nbs.go.tz/index.php/en/%0Ahttp://www.nigerianstat.gov.ng/>
- 356 23. Ministry of Health Zanzibar. Ministry of Health Zanzibar [Internet]. 2023 [cited 2023 Dec 16]. p. 1–  
357 184. Available from: [http://coastalforests.tfcg.org/pubs/Jozani biodiversity inventory report](http://coastalforests.tfcg.org/pubs/Jozani%20biodiversity%20inventory%20report%202002.pdf)  
358 2002.pdf
- 359 24. Macro International Inc. The DHS Program - DHS Questionnaires [Internet]. Demographic and  
360 Health Surveys. 2023 [cited 2023 Dec 16]. Available from:  
361 [https://dhsprogram.com/Methodology/Survey-Types/DHS-Questionnaires.cfm#CP\\_JUMP\\_16179](https://dhsprogram.com/Methodology/Survey-Types/DHS-Questionnaires.cfm#CP_JUMP_16179)
- 362 25. Mishra V, Vaessen M, Boerma JT, Arnold F, Way A, Barrere B, et al. HIV testing in national  
363 population-based surveys : experience from the Demographic and Health Surveys.  
364 2006;029520(05):537–45.
- 365 26. Macro International Inc. Measure DHS. The DHS Program - Protecting the Privacy of DHS Survey  
366 Respondents [Internet]. DHS. 2021 [cited 2023 Dec 16]. Available from:  
367 <https://dhsprogram.com/methodology/Protecting-the-Privacy-of-DHS-Survey-Respondents.cfm>
- 368 27. Kangmennaang J, Mkandawire P, Luginaah I. Breast cancer screening among women in  
369 Namibia : explaining the effect of health insurance coverage and access to information on

- 370 screening behaviours. 2017;0(June):1–12.
- 371 28. Antabe R, Kansanga M, Sano Y, Kyeremeh E, Galaa Y. Utilization of breast cancer screening in  
372 Kenya : what are the determinants ? 2020;2:1–9.
- 373 29. Titilayo A, Palamuleni ME, Olaoye-oyesola JO, Olumide M. Men ‘ s Attitude towards Female  
374 Genital Cutting Religious Perceptions and Attitudes of Men towards Discontinuation of Female  
375 Genital Cutting in Nigeria : Evidence from the 2013 Nigeria Demographic and Health Survey.  
376 African J Reprod Heal. 2018;22(March):20–8.
- 377 30. Ba DM, Ssentongo P, Kjerulff KH, Na M, Liu G, Gao X, et al. Adherence to Iron Supplementation  
378 in 22 Sub-Saharan African Countries and Associated Factors among Pregnant Women : A Large  
379 Population-Based Study. Curr Dev Nutr [Internet]. 2019;3(12):nzz120. Available from:  
380 <https://doi.org/10.1093/cdn/nzz120>
- 381 31. Laura L. Lunani, Andrew Abaasa and GO-M. PREVALENCE AND FACTORS ASSOCIATED  
382 WITH CONTRACEPTIVE USE AMONG KENYAN WOMEN AGED 15–49 YEARS. HHS Public  
383 Access. 2019;22(Suppl 1):125–30.
- 384 32. Donni OS, Bishanga DR, Mbalawata IS. Application of variance components to the identification of  
385 determinants of modern contraceptive use in the Tanzania demographic and health survey data.  
386 BMC Public Health [Internet]. 2022;1–10. Available from: [https://doi.org/10.1186/s12889-022-](https://doi.org/10.1186/s12889-022-13636-5)  
387 13636-5
- 388 33. Ogbo FA, Ogeleka P, Awosemo AO. Trends and determinants of complementary feeding  
389 practices in. 2018;1–13.
- 390 34. Ogbo FA, Ezeh OK, Awosemo AO, Ifegwu IK, Tan L, Jessa E, et al. Determinants of trends in  
391 neonatal, post-neonatal, infant, child and under-five mortalities in Tanzania from 2004 to 2016.  
392 BMC Public Health. 2019;19(1):1–12.
- 393 35. Lipschitz S. Screening mammography with special reference to guidelines in South Africa.  
394 2018;1–7.

- 395 36. Corbex M, Burton R, Sancho-garnier H. Breast cancer early detection methods for low and middle  
396 income countries , a review of the evidence. 2012;21:428–34.
- 397 37. Sankaranarayanan R, Ramadas K, Thara S, Muwonge R, Prabhakar J, Augustine P, et al. Clinical  
398 Breast Examination : Preliminary Results from a Cluster Randomized Controlled Trial in India.  
399 2011;103(19).
- 400 38. Pisani P, Parkin DM, Ngelangel C, Esteban D, Gibson L, Munson M, et al. Outcome of screening  
401 by clinical examination of the breast in a trial in the Philippines. 2006;154:149–54.
- 402 39. More P, All M, Cancer B, Module A. Screening by Clinical Breast Examination in Western Kenya :  
403 Who Comes ? 2016;2(3).
- 404 40. Research IC of M. NATIONAL CANCER REGISTRY. Natl Cancer Regist Program. 2006;
- 405 41. Curado. M. P., B., Shin. H.R, Storm. H., Ferlay.J. H. and B. Cancer Incidence in Five Continents.  
406 Int Assoc Cancer Regist. 2007;IX(160).
- 407 42. Akinyemiju TF. Socio-Economic and Health Access Determinants of Breast and Cervical Cancer  
408 Screening in Low-Income Countries : Analysis of the World Health Survey. 2012;7(11):3–10.
- 409 43. Abuidris DO, Elsheikh A, Ali M, Musa H, Elgaili E, Ahmed AO, et al. Breast-cancer screening with  
410 trained volunteers in a rural area of Sudan : a pilot study. Lancet Oncol [Internet]. 14(4):363–70.  
411 Available from: [http://dx.doi.org/10.1016/S1470-2045\(12\)70583-1](http://dx.doi.org/10.1016/S1470-2045(12)70583-1)
- 412 44. Hongoro C, Mcpake B. How to bridge the gap in human resources for health. 2004;1451–6.
- 413 45. Ochako R, Fotso J, Ikamari L, Khasakhala A. Utilization of maternal health services among young  
414 women in Kenya : Insights from the Kenya Demographic and Health Survey , 2003. 2011;1–9.
- 415 46. Strother RM, Asirwa FC, Busakhala NB, Njiru E, Orang E, Njuguna F, et al. The evolution of  
416 comprehensive cancer care in Western Kenya &. J Cancer Policy [Internet]. 2013;1(1–2):e25–30.  
417 Available from: <http://dx.doi.org/10.1016/j.jcpc.2013.04.001>
- 418 47. Institute NC. Risk Factors: Age - NCI [Internet]. 2021 [cited 2023 Dec 20]. Available from:

419 <https://www.cancer.gov/about-cancer/causes-prevention/risk/age>

420

421

422

423

424

425

426

427

428

429

430

431

432

433

434

435

436

437

438

439

440

441

442

443

444

445

446
